# Supplementary material for: Validation of the Aktiia blood pressure cuff for clinical use according to the ANSI/AAMI/ISO 81060-2:2013 protocol
Source: PubMed Central journal article supplement — Blood Press Monit. 2023 Feb 17;28(2):109–12. doi: 10.1097/MBP.0000000000000639 (PMC9981319; doi:10.1097/mbp.0000000000000639), 2023-02-17
Supplement: bpmj-28-109-s001.pdf [file bpmj-28-109-s001.pdf]

# **Validation of the Aktiia Blood Pressure Cuff for Clinical Use According to the ANSI/AAMI/ISO 81060-2:2013 Protocol**

Jérémy Alexandre<sup>1</sup>; Kevin Tan<sup>2</sup>; Tiago P Almeida<sup>1</sup>; Josep Sola<sup>1</sup>; Bruce S Alpert<sup>3</sup>; Jay Shah<sup>1</sup>

<sup>1</sup>Aktiia SA, Neuchâtel, Switzerland; <sup>2</sup>Guangdong Transtek Medical Electronics, Zhongshan, China; <sup>3</sup>Retired from Department of Pediatrics, University of Tennessee Health Science Center, Memphis, USA

## **Supplementary Materials**

### **Address for correspondence:**

Jay Shah

Aktiia SA

Rue du Bassin 8a, 2000 Neuchâtel, Switzerland

Email: [publication@aktiia.com](mailto:publication@aktiia.com)

Tel: +41 32 552 20 52

Fax: +41 31 4159 2653

## Methods

### *Statistical Analysis*

In addition to the ISO 81060-2 protocol, population-level differences in BP measurements between Aktiia cuff and the reference double-auscultation were investigated with scatter plots and Pearson correlation ( $R^2$ ).

Here, we also included the 95% confidence interval (CI) of BP differences between Aktiia cuff and reference double-auscultation, and the Student's paired t-tests. P-values of less than 0.05 were considered statistically significant.

## Results

Significant differences – albeit well within the limits delineated by ISO 81060-2 [1] – were found between Aktiia cuff and reference double-auscultation for SBP ( $\mu \pm \sigma$  [95% CI]:  $1.3 \pm 7.11$  [0.4, 2.2] mmHg,  $P=0.0034$ ). Conversely, non-significant bias were found for DBP ( $-0.16 \pm 5.46$  [-0.8, 0.5] mmHg,  $P=0.6467$ ).

SBP and DBP measurements performed by the Aktiia cuff were highly correlated with the reference double-auscultation (Figure S1,  $R^2 = 0.93$  and  $R^2 = 0.91$ , respectively).

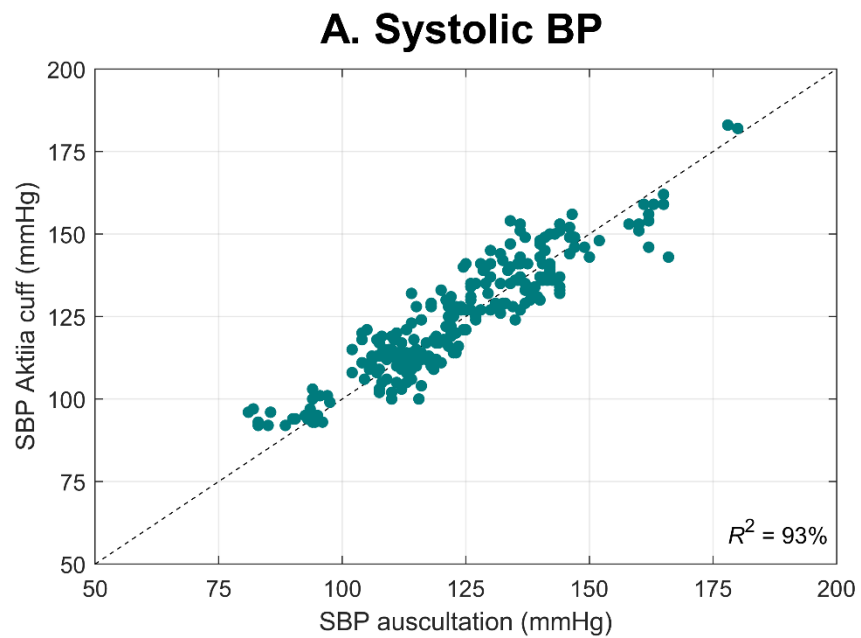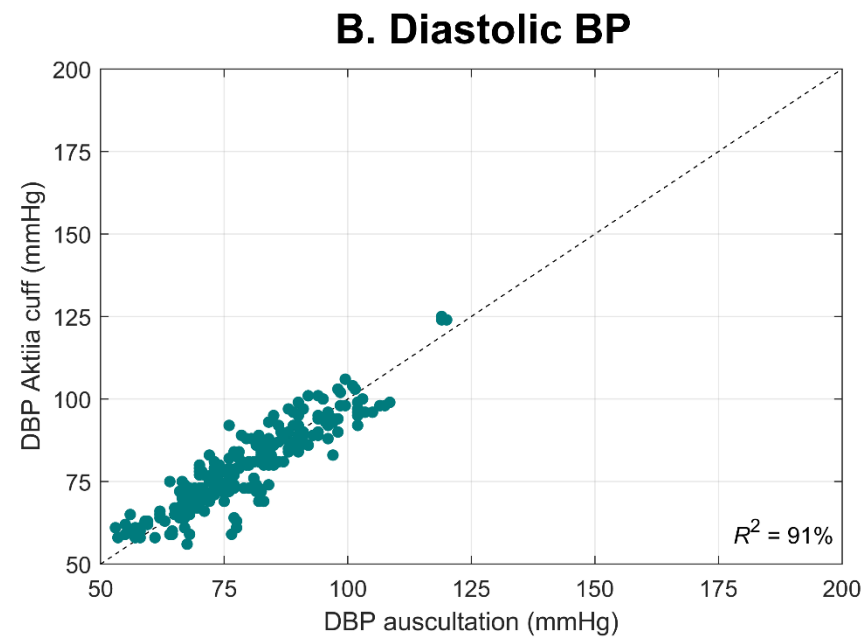

**Figure S1.** Scatter plots comparing BP measurements performed by the Aktiia cuff and the reference double-auscultation.

## **REFERENCES**

- [1] Association for the Advancement of Medical Instrumentation, American National Standards Institute, International Organization for Standardization. AAMI/ANSI/ISO 81060-2:2013, Non-invasive Sphygmomanometers - Part 2: Clinical Investigation of Automated Measurement Type. 2013.
